# Supplementary material for: IgE Trimers Drive SPE-7 Cytokinergic Activity
Source: PubMed Central journal article supplement (PMC5557881; doi:10.1038/s41598-017-08212-6), 2017-08-15
Supplement: 41598_2017_8212_MOESM1_ESM.pdf [file 41598_2017_8212_MOESM1_ESM.pdf]

## SUPPLEMENTARY INFORMATION

### **IgE Trimers Drive SPE-7 Cytokinergic Activity**

Heather J Bax<sup>1,2</sup>, Holly Bowen<sup>1,2,3</sup>, Rebecca L Bevil<sup>1,2</sup>, Raymond Chung<sup>4</sup>, Malcolm Ward<sup>4</sup>, Anna M Davies<sup>1,2</sup>, Tihomir S Dodev<sup>1,3</sup>, James M McDonnell<sup>1,2</sup>, Andrew J Bevil<sup>1,2</sup>, Brian J Sutton<sup>1,2</sup>, Hannah J Gould<sup>1,2,3</sup>

**Supplementary Figure 1 Production of recombinant SPE-7 IgE antibodies.** (A) Schematic of murine and human chimeric SPE-7 IgE antibodies, rmSPE-7 and rhSPE-7 respectively, with murine SPE-7 VH and VL domains (white) and either murine (black) or human (grey) constant domains. (B) DNP-specificity of both recombinant IgE antibodies was confirmed by ELISAs with DNP-BSA used to capture the antibodies in cell culture supernatants and binding detected by using anti-murine IgE and anti-human IgE antibodies, respectively. (C) Purified recombinant SPE-7 antibodies were analysed by SDS-PAGE alongside the unpurified Sigma mSPE-7 IgE preparation.

**Supplementary Figure 2 Contamination of Sigma mSPE-7 IgE.** (A) The unpurified Sigma mSPE-7 IgE preparation was titrated on an SDS-PAGE gel and densitometry used to determine the percentage of the contamination band (indicated by \*) of the total protein. An average 17% contamination was calculated. (B) Following SDS-PAGE analysis of Sigma mSPE-7 IgE under denaturing protein bands 1-6 were excised for evaluation by LC-MS/MS. (C) The overall sequence coverage with NS1 hybridoma cell-derived sequences is indicated (amino acids shaded grey indicates where coverage was achieved). (D) The activity of the Sigma mSPE-7 IgE preparation contaminant, murine C3a, was evaluated in an RBL-SX38 mast cell degranulation experiment. Murine C3a alone (left panel; black lower bars) or in combination with recombinant SPE-7 IgE (rSPE-7, shown to be non-cytokinergic in Fig. 1C; right panel; black lower bars) did not induce any mast cell degranulation above buffer background control, whereas significant degranulation was induced by the unpurified Sigma mSPE-7 IgE preparation (Sigma mSPE-7; both panels; black lower bars). Means of 3 independent experiments  $\pm$ SEM are shown. Statistically significant difference to background control was determined by one-way ANOVA with Dunnett's post-test; \*\*\*\*  $P < 0.0001$ ; ns  $P > 0.05$ .

**Supplementary Figure 3 Analysis of SPE-7 IgE preparations.** NS1 hybridoma cell mSPE-7 IgE peak B (containing trimers) and re-purified monomer peak were analysed by SDS-PAGE alongside the unpurified Sigma mSPE-7 IgE preparation. Protein bands corresponding to IgE heavy and light chains were identified in all preparations.

**Supplementary Table 1 Summary of protein identifications by LC-MS/MS.** A list of proteins identified at over 95% confidence score within Sigma mSPE-7 IgE gel bands 2, 3, 5 and 6 (gel shown in Supplementary Fig. 2B).

Recombinant SPE-7 IgE

**A**

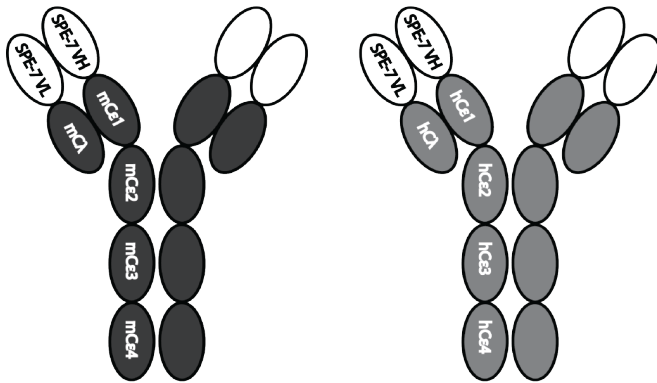

**B**

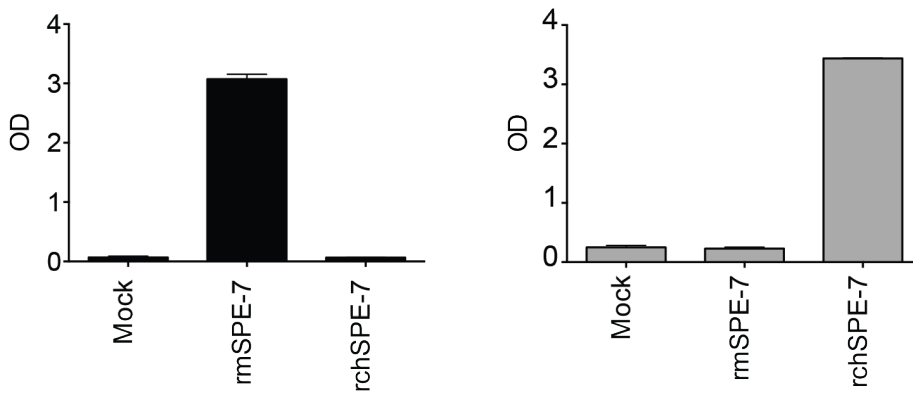

**C**

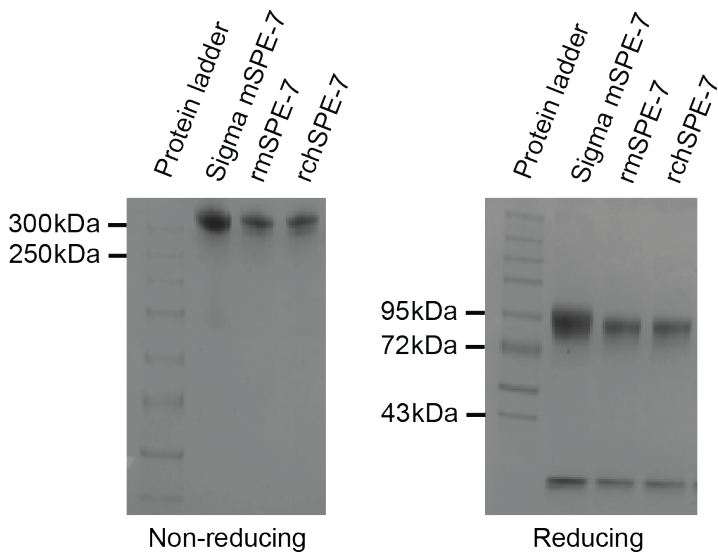

Sigma mSPE-7 IgE

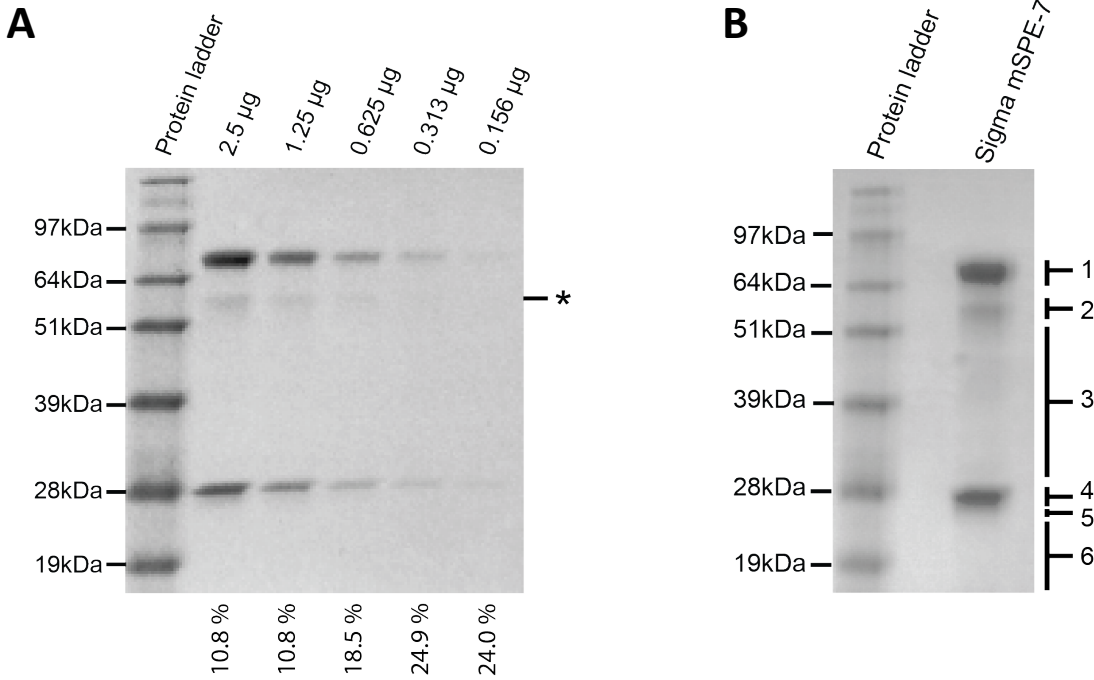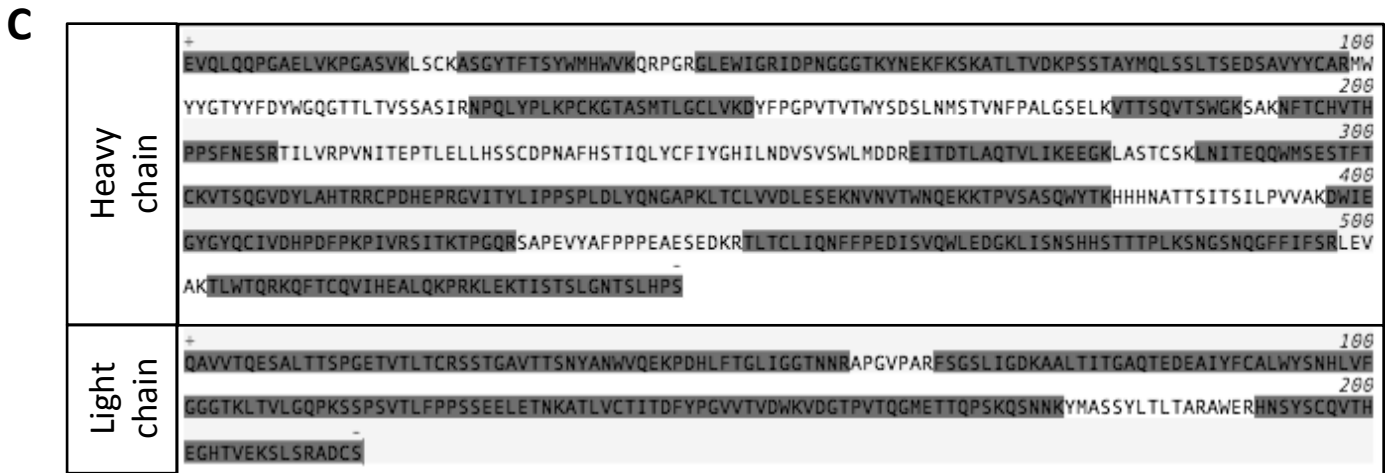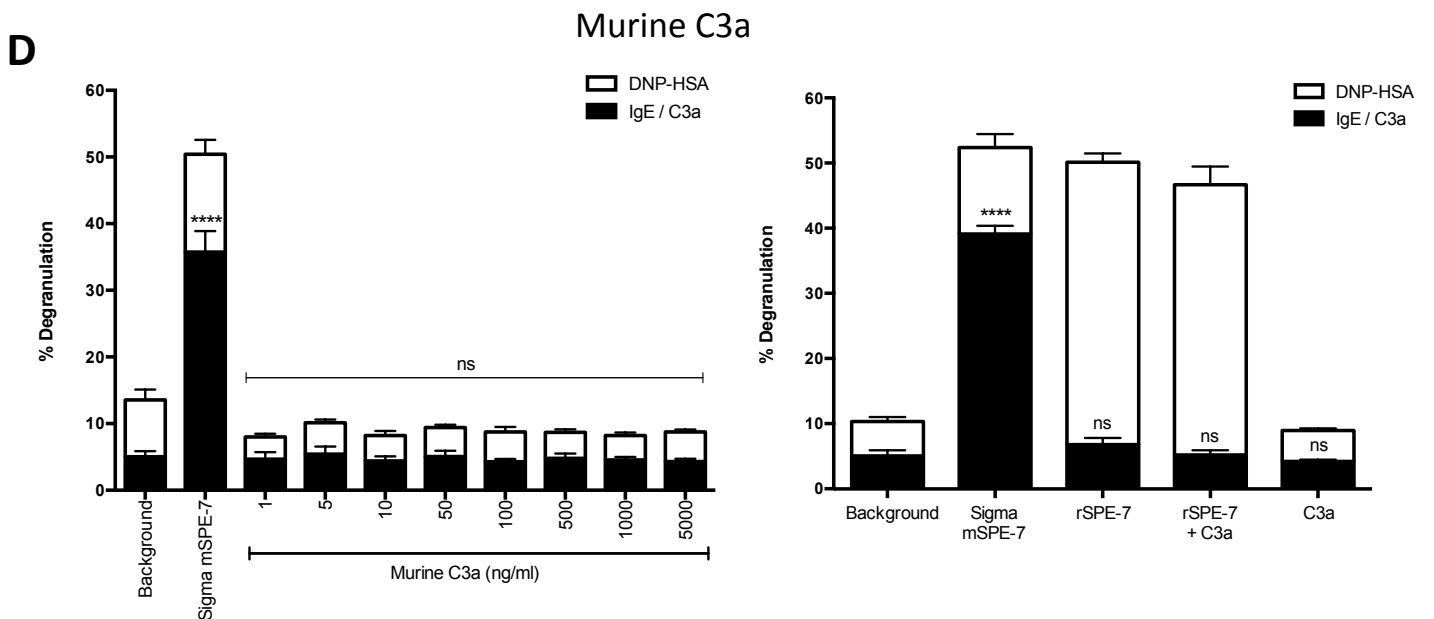

Supplementary Figure 3

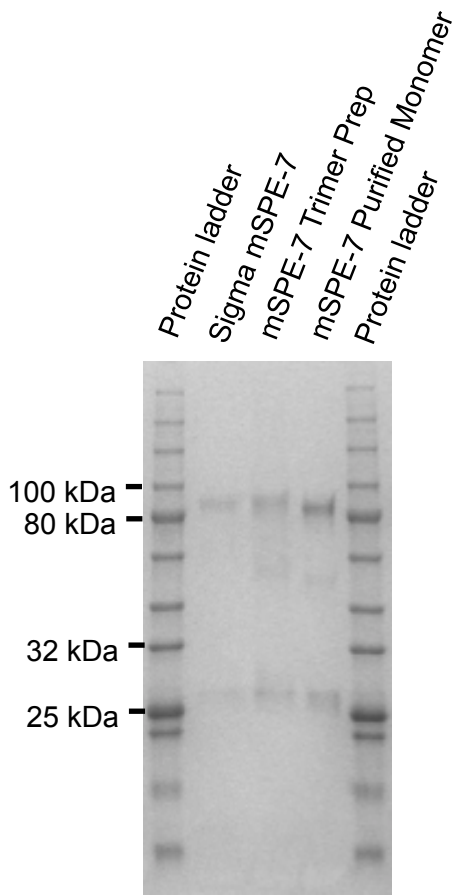

Supplementary Table 1

| Excised band | No. | Identified protein                                                                       | Accession no.    | Molecular weight (kDa) | Unique peptide count |
|--------------|-----|------------------------------------------------------------------------------------------|------------------|------------------------|----------------------|
| Band 2       | 1   | Serum albumin <i>OS=Mus musculus GN=Alb PE=1 SV=3</i>                                    | ALBU_MOUSE       | 69                     | 30                   |
|              | 2   | Serine protease inhibitor A3K <i>OS=Mus musculus GN=Serpina3k PE=1 SV=2</i>              | SPA3K_MOUSE      | 47                     | 23                   |
|              | 3   | Ig epsilon chain C region <i>OS=Mus musculus PE=2 SV=2</i>                               | IGHE_MOUSE       | 47                     | 19                   |
|              | 4   | Antithrombin-III <i>OS=Mus musculus GN=Serpinc1 PE=1 SV=1</i>                            | ANT3_MOUSE       | 52                     | 16                   |
|              | 5   | Complement C4-B <i>OS=Mus musculus GN=C4b PE=1 SV=3</i>                                  | CO4B_MOUSE       | 193                    | 10                   |
|              | 6   | Alpha-1-antitrypsin 1-2 <i>OS=Mus musculus GN=Serpina1b PE=1 SV=2</i>                    | A1AT2_MOUSE      | 46                     | 8                    |
|              | 7   | Inter alpha-trypsin inhibitor, heavy chain 4 <i>OS=Mus musculus GN=Itih4 PE=1 SV=2</i>   | ITIH4_MOUSE      | 105                    | 7                    |
|              | 8   | Ig lambda-1 chain C region <i>OS=Mus musculus PE=1 SV=1</i>                              | LAC1_MOUSE       | 12                     | 5                    |
|              | 9   | Complement C3 <i>OS=Mus musculus GN=C3 PE=1 SV=3</i>                                     | CO3_MOUSE        | 186                    | 5                    |
|              | 10  | Ig heavy chain V region B1-8/186-2 <i>OS=Mus musculus GN=Gm16709 PE=1 SV=1</i>           | HVM07_MOUSE (+1) | 15                     | 5                    |
| Band 3       | 1   | Serum albumin <i>OS=Mus musculus GN=Alb PE=1 SV=3</i>                                    | ALBU_MOUSE       | 69                     | 26                   |
|              | 2   | Ig epsilon chain C region <i>OS=Mus musculus PE=2 SV=2</i>                               | IGHE_MOUSE       | 47                     | 22                   |
|              | 3   | Murinoglobulin-1 <i>OS=Mus musculus GN=Mug1 PE=1 SV=3</i>                                | MUG1_MOUSE       | 165                    | 22                   |
|              | 4   | Serine protease inhibitor A3K <i>OS=Mus musculus GN=Serpina3k PE=1 SV=2</i>              | SPA3K_MOUSE      | 47                     | 15                   |
|              | 5   | Vitamin D-binding protein <i>OS=Mus musculus GN=Gc PE=1 SV=2</i>                         | VTDB_MOUSE       | 54                     | 15                   |
|              | 6   | Complement C4-B <i>OS=Mus musculus GN=C4b PE=1 SV=3</i>                                  | CO4B_MOUSE       | 193                    | 14                   |
|              | 7   | Complement C3 <i>OS=Mus musculus GN=C3 PE=1 SV=3</i>                                     | CO3_MOUSE        | 186                    | 13                   |
|              | 8   | Ig gamma-2A chain C region, A allele <i>OS=Mus musculus GN=Ighg PE=1 SV=1</i>            | GCAA_MOUSE (+1)  | 36                     | 13                   |
|              | 9   | Antithrombin-III <i>OS=Mus musculus GN=Serpinc1 PE=1 SV=1</i>                            | ANT3_MOUSE       | 52                     | 12                   |
|              | 10  | Ig gamma-3 chain C region <i>OS=Mus musculus PE=1 SV=2</i>                               | IGHG3_MOUSE      | 44                     | 12                   |
| Band 5       | 1   | Ig epsilon chain C region <i>OS=Mus musculus PE=2 SV=2</i>                               | IGHE_MOUSE       | 47                     | 15                   |
|              | 2   | Ig lambda-1 chain C region <i>OS=Mus musculus PE=1 SV=1</i>                              | LAC1_MOUSE       | 12                     | 9                    |
|              | 3   | Ig kappa chain C region <i>OS=Mus musculus PE=1 SV=1</i>                                 | IGKC_MOUSE       | 12                     | 7                    |
|              | 4   | Serum albumin <i>OS=Mus musculus GN=Alb PE=1 SV=3</i>                                    | ALBU_MOUSE       | 69                     | 6                    |
|              | 5   | Ig gamma-2A chain C region, A allele <i>OS=Mus musculus GN=Ighg PE=1 SV=1</i>            | GCAA_MOUSE (+1)  | 36                     | 5                    |
|              | 6   | Ig gamma-3 chain C region <i>OS=Mus musculus PE=1 SV=2</i>                               | IGHG3_MOUSE      | 44                     | 5                    |
|              | 7   | Complement C3 <i>OS=Mus musculus GN=C3 PE=1 SV=3</i>                                     | CO3_MOUSE        | 186                    | 4                    |
|              | 8   | Ig kappa chain V-V region K2 (Fragment) <i>OS=Mus musculus PE=1 SV=1</i>                 | KV5A3_MOUSE      | 13                     | 3                    |
|              | 9   | Ig gamma-1 chain C region, membrane-bound form <i>OS=Mus musculus GN=Ighg1 PE=1 SV=2</i> | IGH1M_MOUSE (+1) | 43                     | 3                    |
|              | 10  | Ig gamma-2A chain C region secreted form <i>OS=Mus musculus PE=1 SV=1</i>                | GCAB_MOUSE       | 37                     | 3                    |
| Band 6       | 1   | Ig epsilon chain C region <i>OS=Mus musculus PE=2 SV=2</i>                               | IGHE_MOUSE       | 47                     | 17                   |
|              | 2   | Serum albumin <i>OS=Mus musculus GN=Alb PE=1 SV=3</i>                                    | ALBU_MOUSE       | 69                     | 14                   |
|              | 3   | Desmoplakin <i>OS=Mus musculus GN=Dsp PE=3 SV=1</i>                                      | DESP_MOUSE       | 333                    | 12                   |
|              | 4   | Ig kappa chain C region <i>OS=Mus musculus PE=1 SV=1</i>                                 | IGKC_MOUSE       | 12                     | 7                    |
|              | 5   | Complement C4-B <i>OS=Mus musculus GN=C4b PE=1 SV=3</i>                                  | CO4B_MOUSE       | 193                    | 7                    |
